# Supplementary material for: PI3K–mTORC2 but not PI3K–mTORC1 Regulates Transcription of HIF2A/EPAS1 and Vascularization in Neuroblastoma
Source: Oxford University Press journal article supplement (doi:10.1158/0008-5472.can-15-0708), 2015-10-02
Supplement: 00085472can150708-sup-146674_2_supp_0_ntlgzh.xlsx [file 00085472can150708-sup-146674_2_supp_0_ntlgzh.xlsx]

## Sheet: Blad1
Supplementary Table S2. Nucleotide sequences of primers used for qPCR reactions.
Gene	Forward	Reverse
SDHA	5’- TGGGAACAAGAGGGCATCTG -3’	5’- CCACCACTGCATCAAATTCATG -3’
UBC	5’- ATTTGGGTCGCGGTTCTTG -3’	5’- TGCCTTGACATTCTCGATGGT -3’
YWHAZ	5’- ACTTTTGGTACATTGTGGCTTCAA -3’	5’- CCGCCAGGACAAACCAGTAT -3’
AKT1	5’- ATGAGCGACGTGGCTATTGTGAAG -3’	5’- GAGGCCGTCAGCCACAGTCTGGAT -3’
AKT2	5’- CCACGACTGAGGAGATGGA -3’	5’- GGTGACTGTGTGAGCGACTT -3’
AKT3	5’- ATGAGCGATGTTACCATTGT -3’	5’- CAGTCTGTCTGCTACAGCCTG -3’
DEC1	5’- CAGTGGCTATGGAGGAGAATCG -3’	5’- GCGTCCGTGGTCACTTTTG -3’
HIF1A	5’- TTCCAGTTACGTTCCTTCGATCA -3’	5’- TTTGAGGACTTGCGCTTTCA -3’
HIF2A	5’- GTGCTCCCACGGCCTGTA -3’	5’- TTGTCACACCTATGGCATATCACA -3’
IGF1R	5’- TGAAAGGAAGCGGAGAGATG -3’	5’- GGGTCGGTGATGTTGTAGGT -3’
IGF2R	5’- TGGGAGTGTGTGGTCAGTTT -3’	5’- CCTGGTCTGTATCCGTCGTT -3’
INSR	5’- GCTGGAGATGGAGTTTGAGG -3’	5’- TGTGTGTGTAAGGGATGTGTTC -3’
PDGFB	5’- AGATCGAGATTGTGCGGAAGA -3’	5’- GTCGCCACTGTCTCACACTTG -3’
RAPTOR	5’- TGCCTGAGTCGGTAAATGTG -3’	5’- CTGTTGTAGATGGCGGTGAA -3’
SERPINB9	5’- CTTCGGCATTTGGGAATTGT -3’	5’- GGTCTCTCTCCGCTGACATTG -3’
SIN1	5’- TACGAATCAGAAAGCCAGCA -3’	5’- CTCTTCAGCAAGGTCACAGG -3’
VEGFA	5’- AGGAGGAGGGCAGAATCATCA -3’	5’- CTCGATTGGATGGCAGTAGCT -3’
Three reference genes (YWHAZ, SDHA, and UBC) were used to normalize gene-of-interest expression (2).
Supplementary References
(2) Vandesompele J, De Preter K, Pattyn F, Poppe B, Van Roy N, De Paepe A, et al. Accurate normalization
of real-time quantitative RT-PCR data by geometric averaging of multiple internal control genes.
Genome biology 2002;3(7):RESEARCH0034.
