# Supplementary material for: PI3K–mTORC2 but not PI3K–mTORC1 Regulates Transcription of HIF2A/EPAS1 and Vascularization in Neuroblastoma
Source: Oxford University Press journal article supplement (doi:10.1158/0008-5472.can-15-0708), 2015-10-02
Supplement: 00085472can150708-sup-146674_2_supp_3076677_ns5z35.xlsx [file 00085472can150708-sup-146674_2_supp_3076677_ns5z35.xlsx]

## Sheet: Blad1
Supplementary Table S1. Antibodies used for western blotting.
Primary antibodies	Species	Source	Catalog #
HIF-1α	Rabbit	Millipore	07-628
HIF-1α	Mouse	BD Biosciences	610959
HIF-2α	Rabbit	Abcam	ab199
HIF-2α	Rabbit	(1)
pAkt (S473)	Rabbit	Cell Signaling	4060
PTEN	Rabbit	Cell Signaling	9559
PRAS40 (pT246)	Rabbit	Abcam	ab134084
Actin	Mouse	MP Biomedicals	691001
SDHA	Mouse	Abcam	ab14715
Secondary antibodies	Species	Company	Catalog #
Mouse	Sheep	GE Healthcare	NA931V
Rabbit	Donkey	GE Healthcare	NA934V
Supplementary References
(1) Munksgaard Persson M, Johansson ME, Monsef N, Planck M, Beckman S,
Seckl MJ, et al. HIF-2alpha expression is suppressed in SCLC cells, which
survive in moderate and severe hypoxia when HIF-1alpha is repressed. The
American journal of pathology 2012;180(2):494-504.
