# Supplementary material for: PI3K–mTORC2 but not PI3K–mTORC1 Regulates Transcription of HIF2A/EPAS1 and Vascularization in Neuroblastoma
Source: Oxford University Press journal article supplement (doi:10.1158/0008-5472.can-15-0708), 2015-10-02
Supplement: 00085472can150708-sup-146674_2_supp_3076679_ns5z35.xlsx [file 00085472can150708-sup-146674_2_supp_3076679_ns5z35.xlsx]

## Sheet: Blad1
Supplementary Table S3. siRNA oligos used for transfection.
Target gene	Source	Catalog #	Concentration	Sense (5' - 3')	Antisense (5' - 3')
IGF1R	Selleckchem	siRNA kit Gene ID 3480	50 nM	Not availabe	Not availabe
IGF2R	Selleckchem	siRNA kit Gene ID 3482	50 nM	Not availabe	Not availabe
INSR #1	Ambion	s7477	5 nM	GAAUGACCAGAGACAUCUAtt	UAGAUGUCUCUGGUCAUUCca
INSR #2	Ambion	s7478	5 nM	GAACGAUGUUGGACUCAUAtt	UAUGAGUCCAACAUCGUUCga
AKT1	Ambion	s660	50 nM	GAACAAUCCGAUUCACGUAtt	UACGUGAAUCGGAUUGUUCtg
AKT2	Ambion	s1217	50 nM	UGACUUCGACUAUCUCAAAtt	UUUGAGAUAGUCGAAGUCAtt
AKT3	Ambion	s19428	50 nM	GGACUAUCUACAUUCCGGAtt	UCCGGAAUGUAGAUAGUCCaa
RAPTOR #1	Ambion	s33214	10 nM	GUACAUCCCUCUGUCCAUAtt	UAUGGACAGAGGGAUGUACtg
RAPTOR #2	Ambion	s33215	10 nM	GCAUUGGACUUGCUUGGAAtt	UUCCAAGCAAGUCCAAUGCtc
RAPTOR #3	Ambion	s33216	10 nM	CCAUCGGUGCAAAUUUACAtt	UGUAAAUUUGCACCGAUGGtt
Negative Control	Selleckchem	included in each kit	50 nM	Not availabe	Not availabe
Negative Control #2	Ambion	4390846	5 nM / 10 nM	Propritetry	Propritetry
